# Supplementary material
Source: PubMed Central journal article supplement (PMC3427774)

Figure S1 Berman et al.

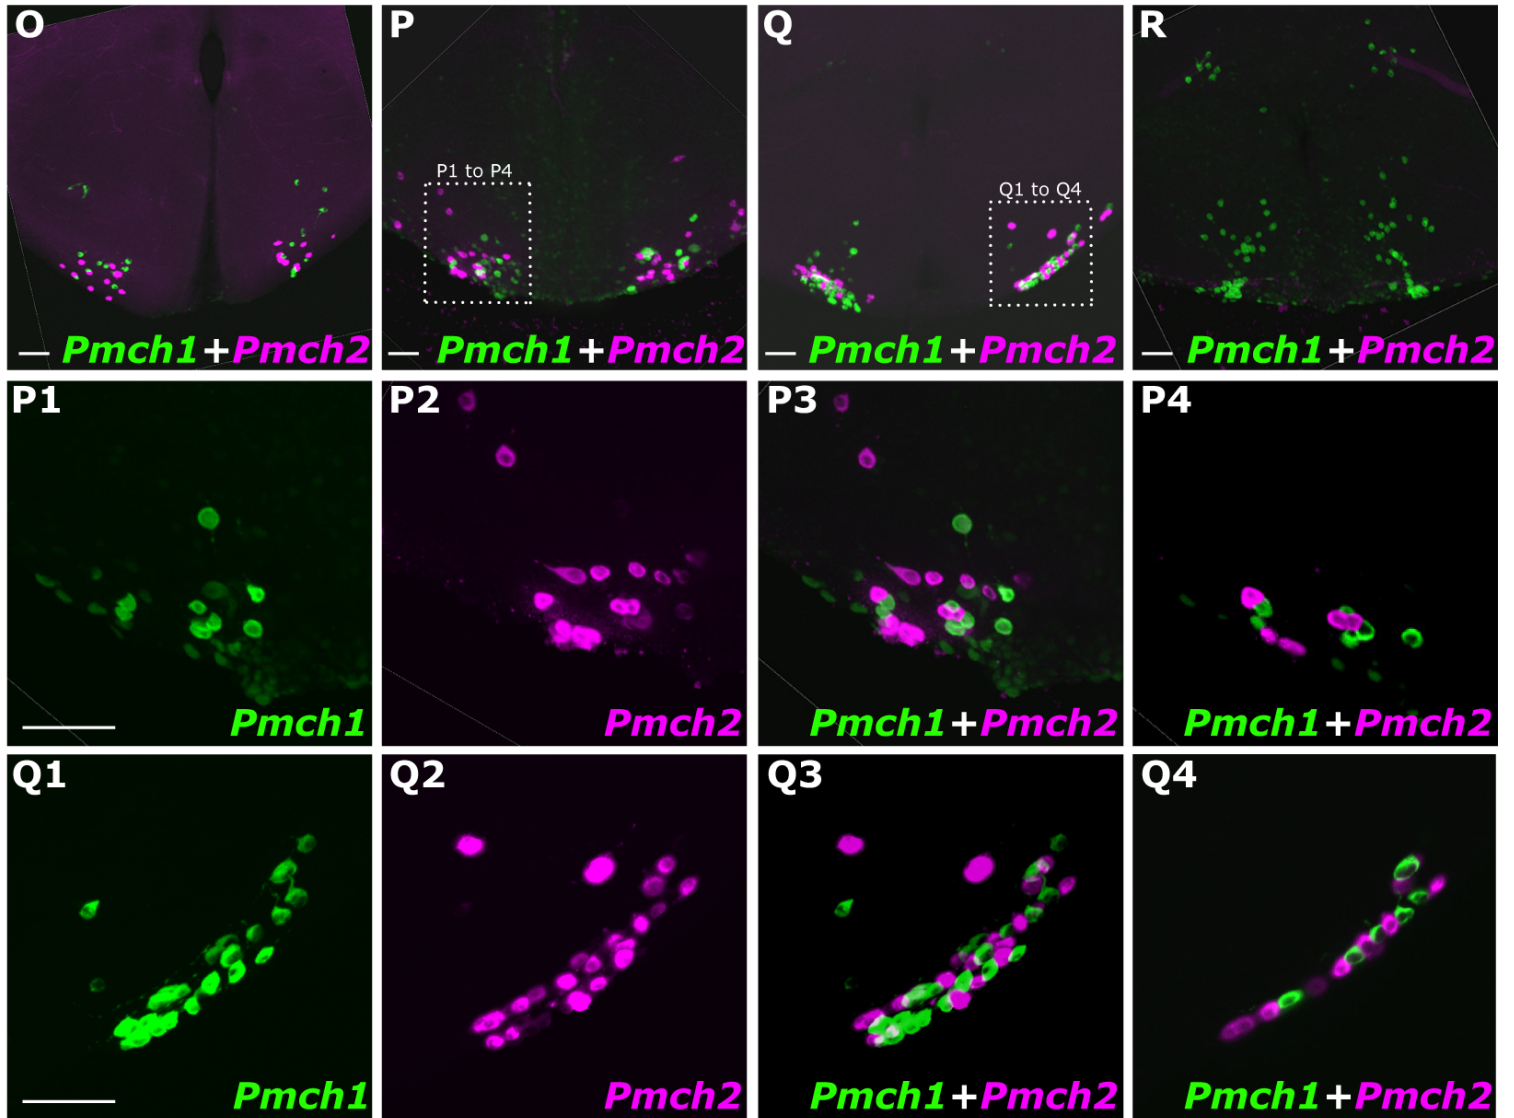

Supplement: NIHMS302956-supplement-Figure_S1.pdf [file NIHMS302956-supplement-Figure_S1.pdf]

Figure S2 Berman et al.

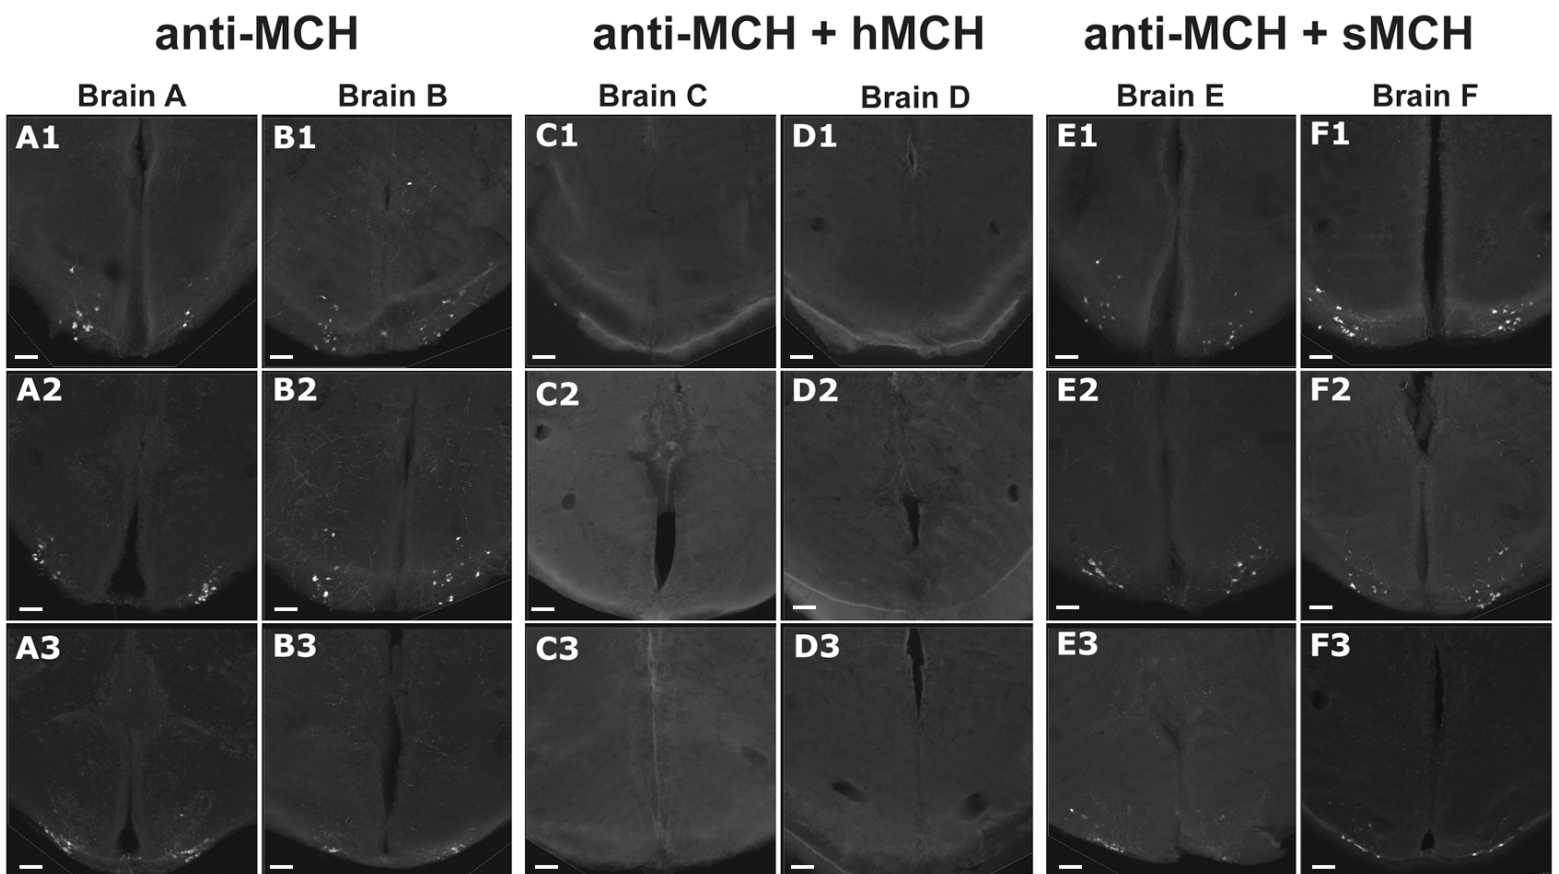

Supplement: NIHMS302956-supplement-Figure_S2.pdf [file NIHMS302956-supplement-Figure_S2.pdf]
